# Supplementary material for: Design, synthesis, pharmacological evaluation, and in silico studies of the activity of novel spiro pyrrolo[3,4-d]pyrimidine derivatives
Source: Royal Society of Chemistry journal article supplement (doi:10.1039/d3ra07078f), 2024-01-01
Supplement: d3ra07078f1.pdf [file d3ra07078f1.pdf]

6/16/2021

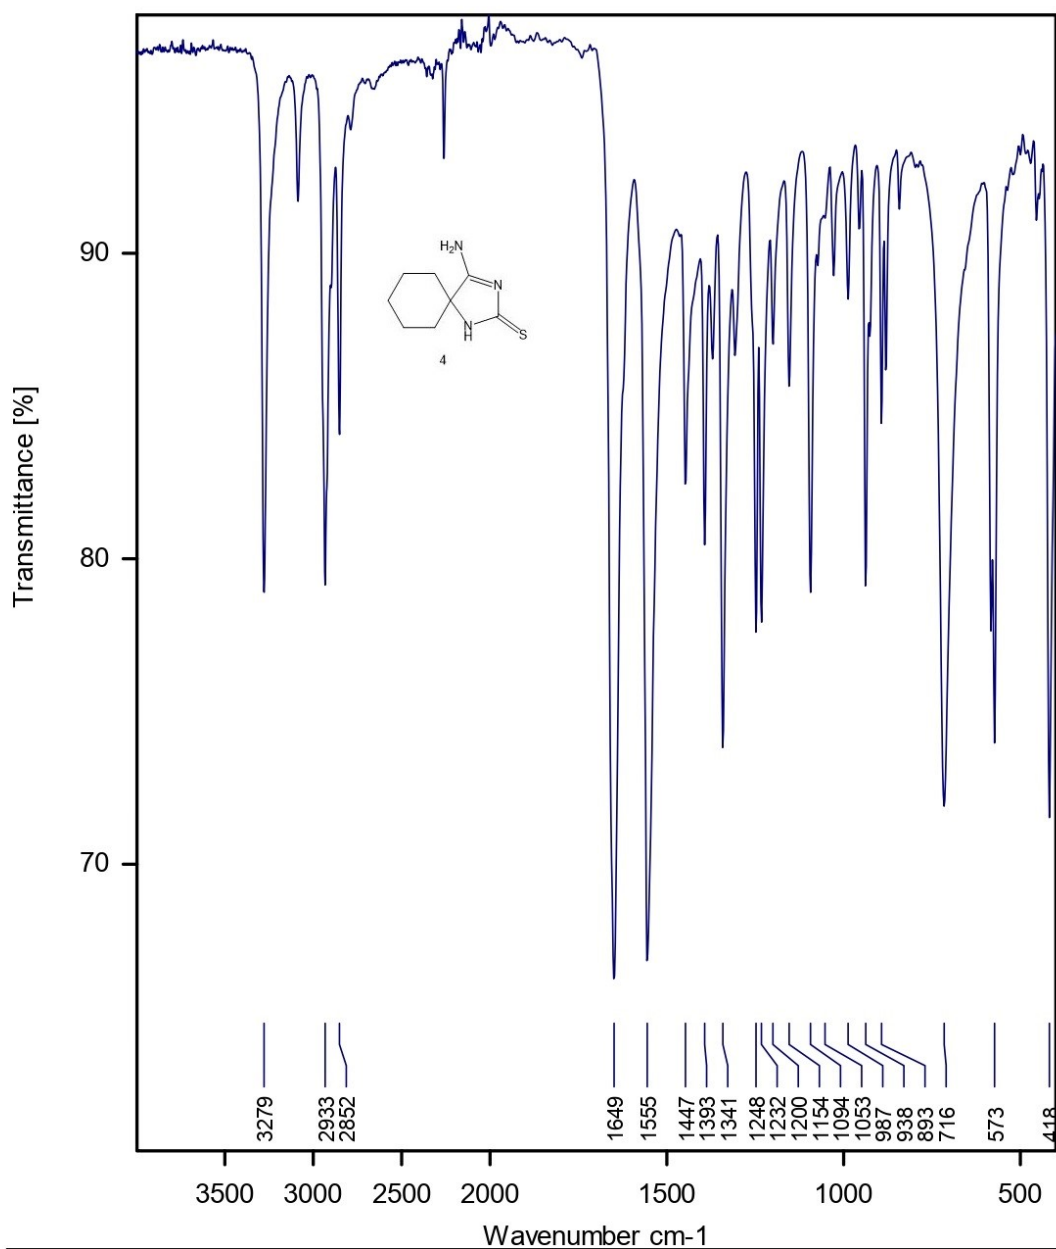

|            |                                    |
|------------|------------------------------------|
| D-asmaa-B1 | Instrument type and / or accessory |
|------------|------------------------------------|

## Spectrum

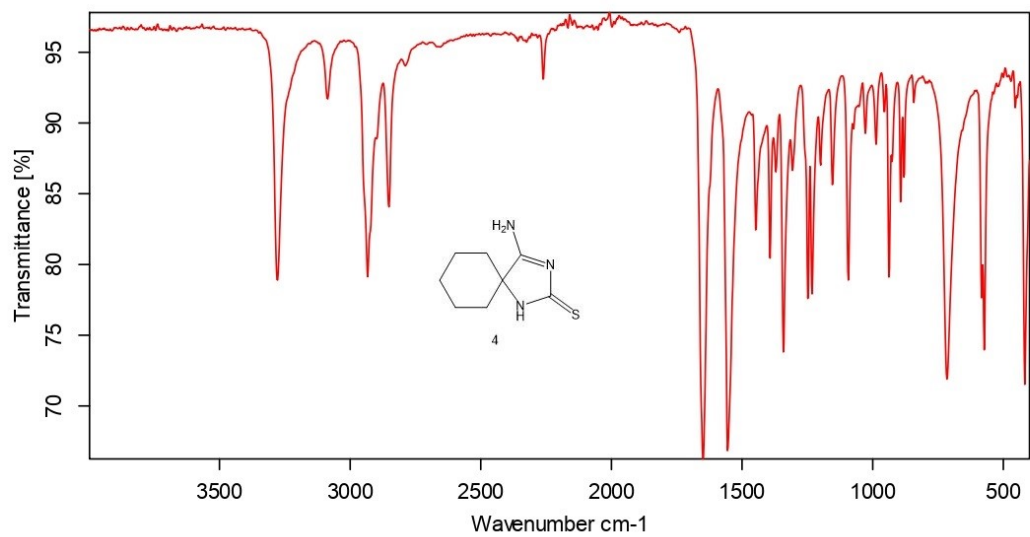

D-asmaa-B1-1H

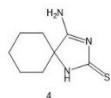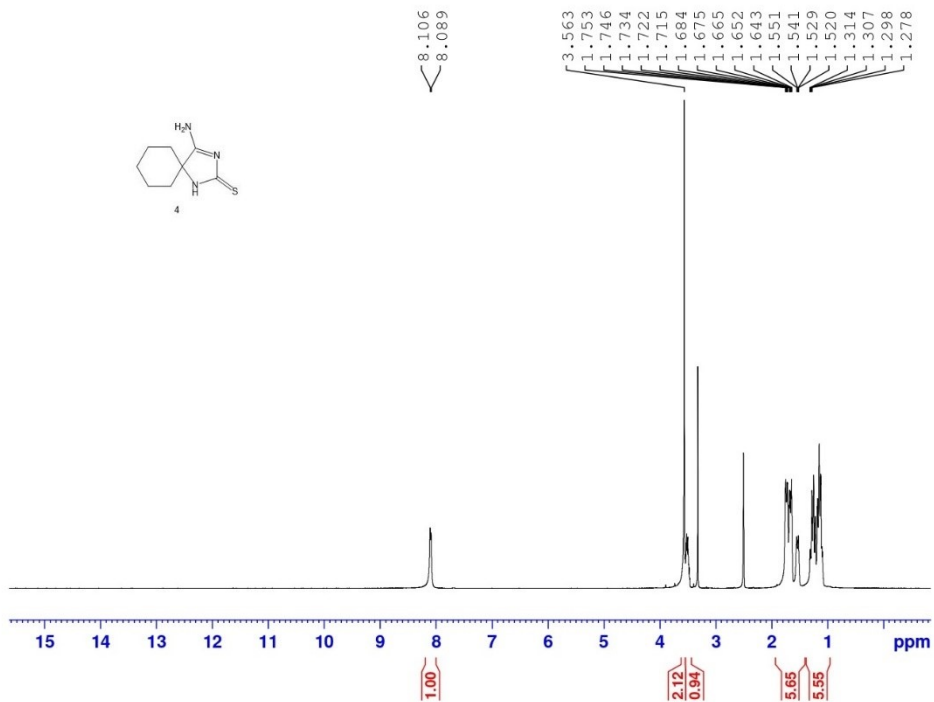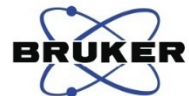

Current Data Parameters  
NAME D-asmaa-B1-1H  
EXPNO 10  
PROCNO 1

F2 - Acquisition Parameters  
Date\_ 20220116  
Time 11:07  
INSTRUM spect  
PROBHD 5 mm F4BBO BB/  
PULPROG zgpg30  
TD 65536  
SOLVENT DMSO  
NS 16  
DS 4  
SWH 8012.820 Hz  
FIDRES 0.122266 Hz  
AQ 4.0354463 sec  
RG 114.00  
IN 62.400 usec  
DE 6.50 usec  
TE 298.2 K  
D1 1.00000000 sec  
TDO 1

\*\*\*\*\* CHANNEL f1 \*\*\*\*\*  
SFO1 400.1324710 MHz  
NUC1 1H  
P1 15.00 usec  
PL1L 10.39559820 V

F2 - Processing parameters  
SI 65536  
SF 400.1300334 MHz  
WDW EM  
SSB 0  
LB 0.30 Hz  
GB 0  
PC 1.00

6/17/2021

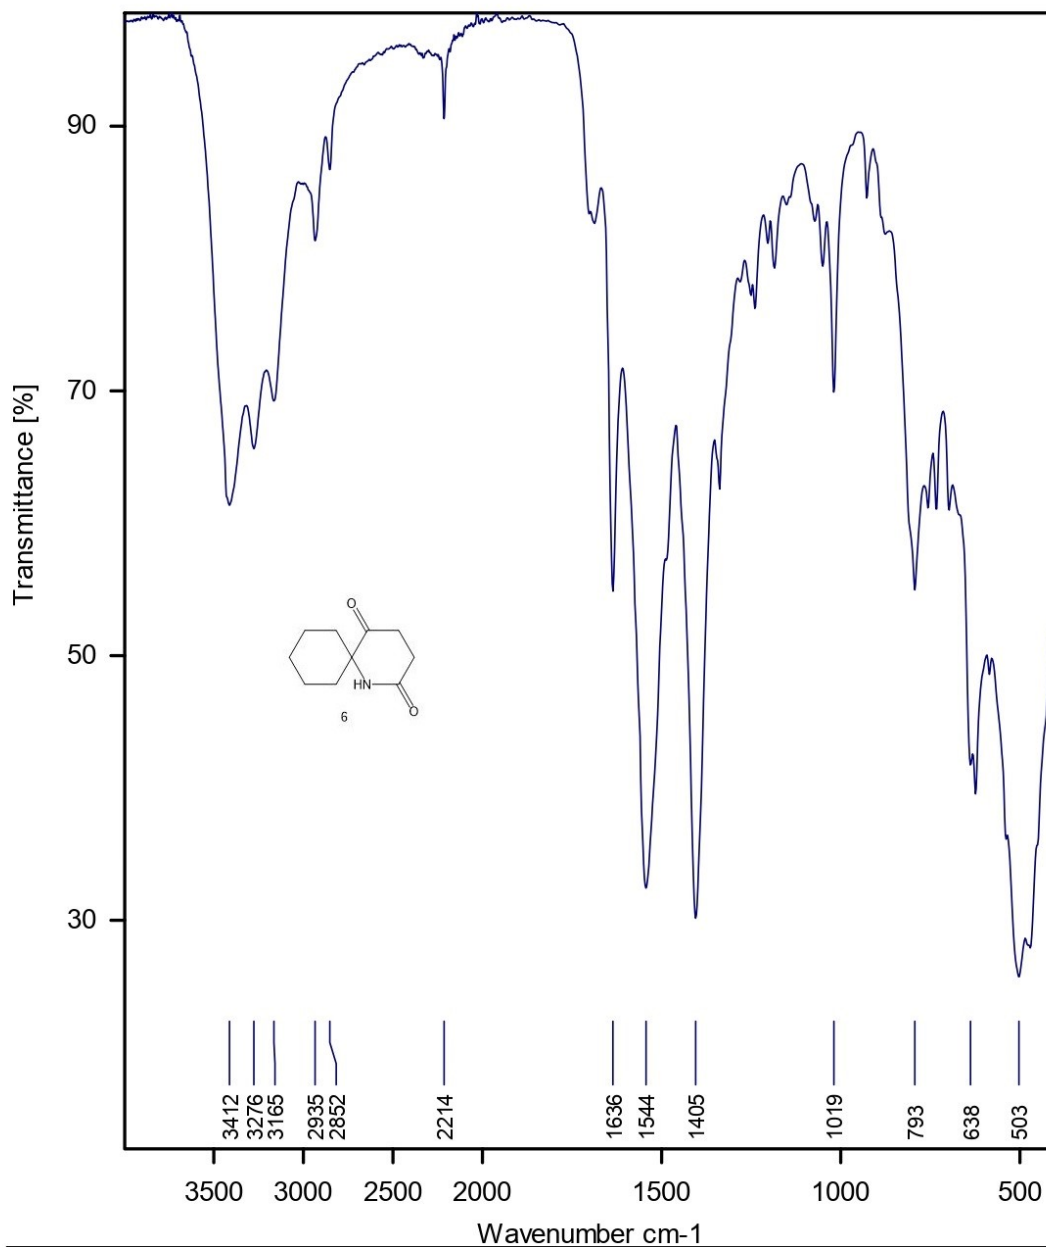

|             |                                    |
|-------------|------------------------------------|
| dr Asmaa B9 | Instrument type and / or accessory |
|-------------|------------------------------------|

D-asmaa-B9-1H

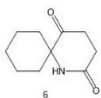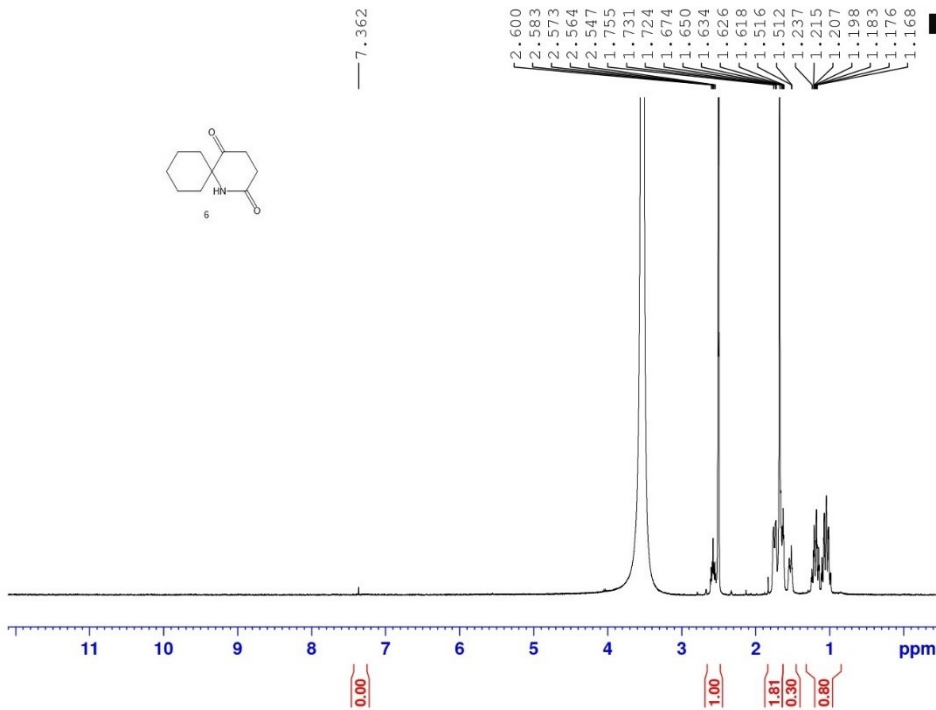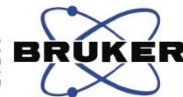

Current Data Parameters  
NAME D-asmaa-B9-1H  
EXPNO 10  
PROCNO 1

F2 - Acquisition Parameters  
Date\_ 20220116  
Time 11:49  
INSTRUM spect  
PROBHD 5 mm PABBO BB  
PULPROG zgpg30  
TD 65536  
SOLVENT DMSO  
NS 16  
DS 2  
SWH 801.820 Hz  
FIDRES 0.122256 Hz  
AQ 4.088465 sec  
RG 149.63  
PC 62.400 usec  
CW 6.50 usec  
DE 0.00 Hz  
DI 1.0000000 sec  
TDO

----- CHANNEL f1 -----  
SFO1 400.126410 MHz  
NUC1 1H  
P1 15.00 usec  
PLW1 10.39999962 W

F2 - Processing parameters  
SI 65536  
SF 400.130024 MHz  
WDW EM  
SSB 0  
LB 0.30 Hz  
GB 0  
PC 1.60

D-asmaa-B9-1H

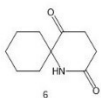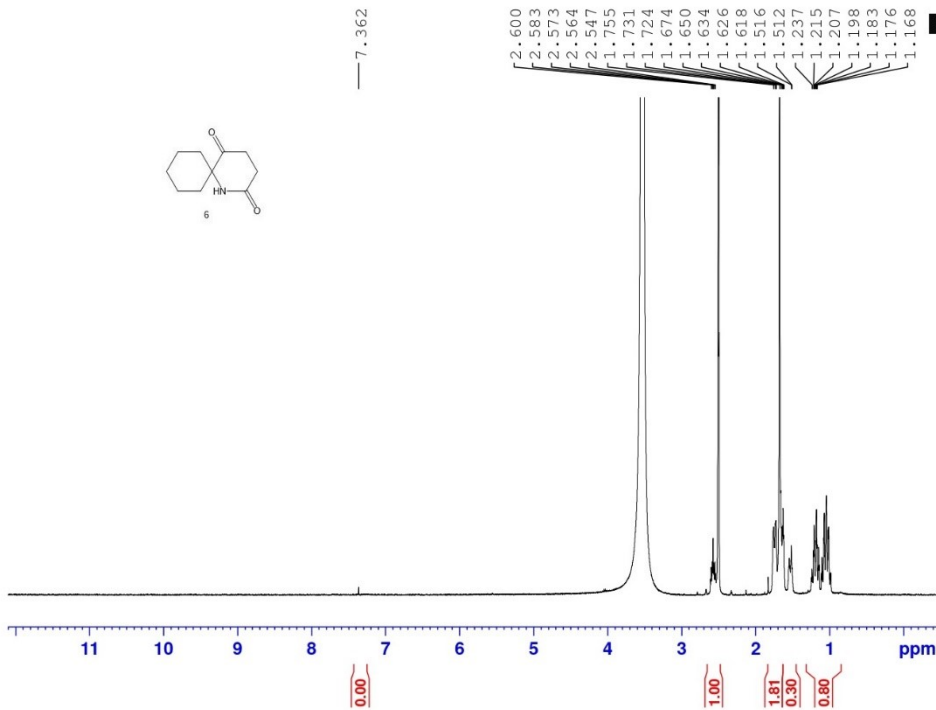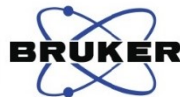

Current Data Parameters  
NAME D-asmaa-B9-1H  
EXPNO 10  
PROCNO 1  
F2 - Acquisition Parameters  
Date\_ 20220116  
Time 11:49  
INSTRUM spect  
PROBHD 5 mm PABBO BB  
PULPROG zgpg30  
TD 65536  
SOLVENT DMSO  
NS 16  
DS 2  
SWH 801.820 Hz  
FIDRES 0.122256 Hz  
AQ 4.088465 sec  
RG 149.63  
CW 62.400 usec  
DE 6.50 usec  
TE 300.2 K  
D1 1.0000000 sec  
TD0  
----- CHANNEL f1 -----  
SFO1 400.1324710 MHz  
NUC1 1H  
P1 15.00 usec  
PLW1 10.39999962 W  
F2 - Processing parameters  
SI 65536  
SF 400.130024 MHz  
WDW EM  
SSB 0  
LB 0.30 Hz  
GB 0  
PC 1.60

6/17/2021

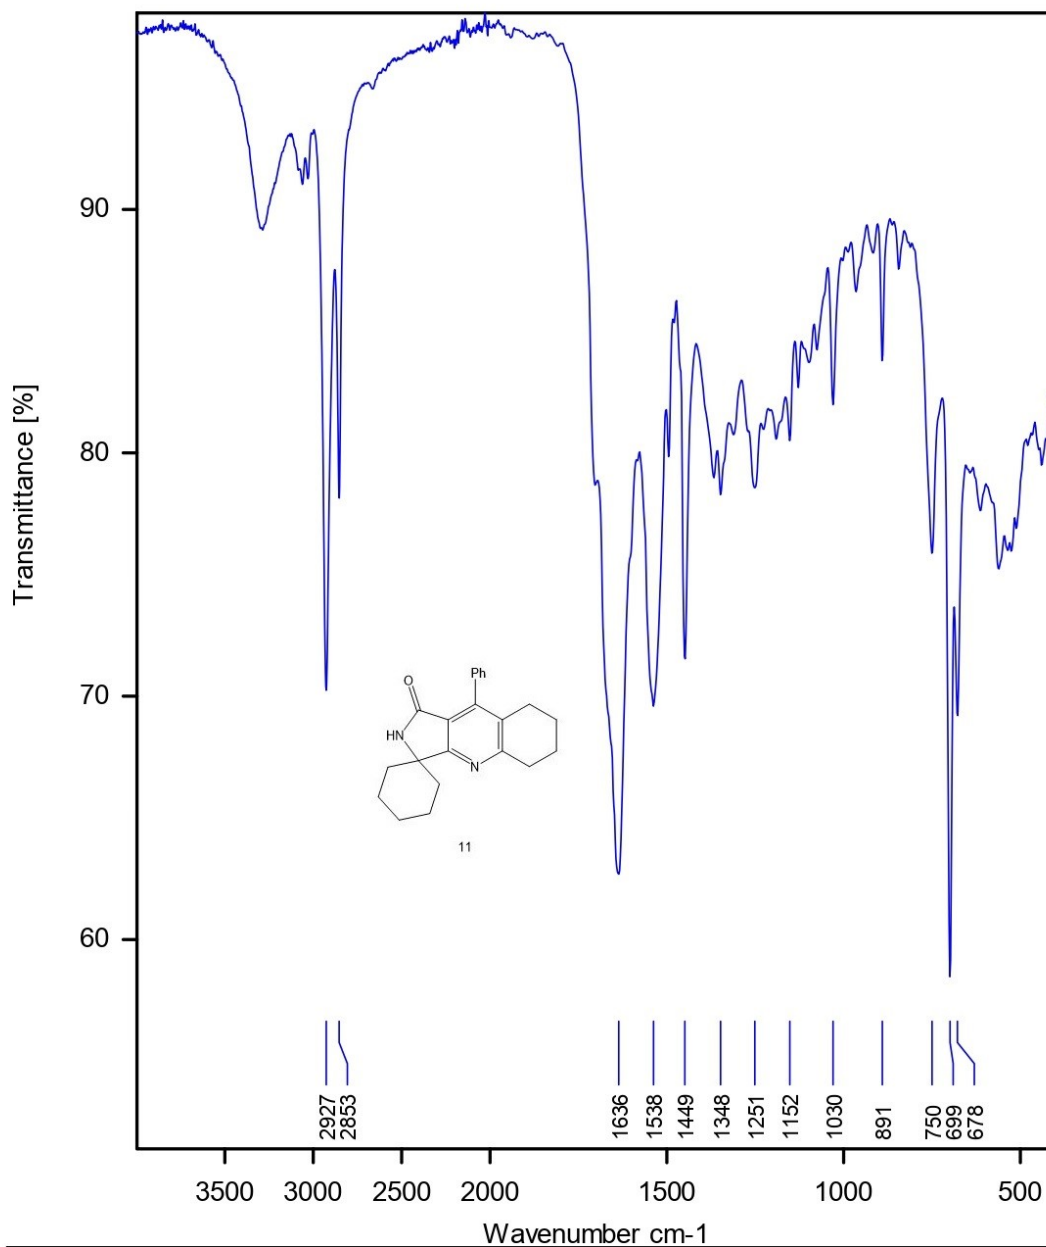

|              |                                    |
|--------------|------------------------------------|
| dr Asmaa B17 | Instrument type and / or accessory |
|--------------|------------------------------------|

D-asmaa-B17-1H

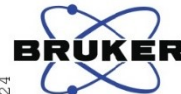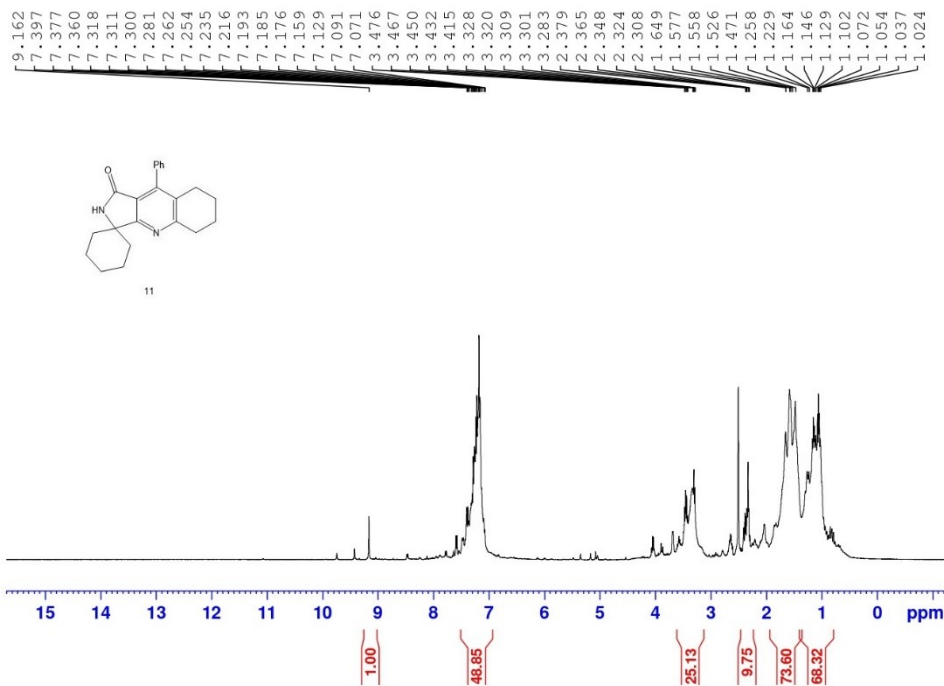

Current Data Parameters  
NAME D-asmaa-B17-1H  
EXPNO 1  
PROCNO 1  
F2 - Acquisition Parameters  
Date\_ 2011219  
Time 12:10  
INSTRUM spect  
PROBHD 5 mm PABBO 2H  
PULPROG zgpg30  
SI 65236  
SOLVENT DMSO  
NS 4  
DS 2  
SWH 8012.826 Hz  
FIDRES 0.122216 Hz  
AQ 4.0894455 sec  
RG 70.84  
DW 62.480 usec  
DE 6.150 usec  
TE 298.1 K  
SI 1.0000000 sec  
TD 1  
----- CHANNEL f1 -----  
NUC1 13C  
P1 15.00 usec  
PL1 0.00 dB  
PR1 19.3593942 W  
F2 - Processing parameters  
SI 65236  
SF 499.1306918 MHz  
WDW EM  
SSB 0  
LB 0.30 Hz  
GB 0  
PC 1.00



D-asmaa-B17--c13

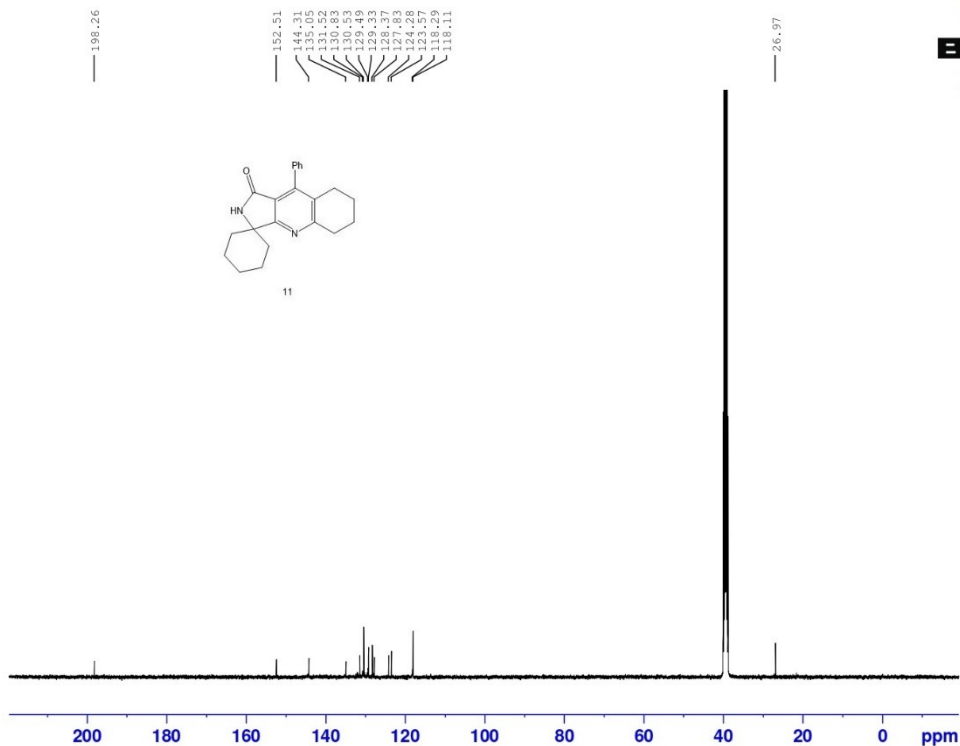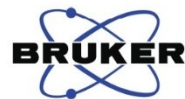

```
Current Data Parameters
NAME: D-asmaa-B17--c13
EXPNO: 10
PROCNO: 1

F2 - Acquisition Parameters
Date_: 20220308
Time: 19.32
INSTRUM: spect
PROBHD: 5 mm PABBO BB/
PULPROG: zgpg30
ID: 65336
SOLVENT: DMSO
NS: 4000
DS: 4
SWH: 24038.461 Hz
FIDRES: 0.366798 Hz
AQ: 1.3631488 sec
RG: 201.61
DW: 20.800 usec
DE: 4.50 usec
TE: 298.2 K
D1: 2.0000000 sec
D11: 0.0300000 sec
TD0: 1

===== CHANNEL f1 =====
NUC1: 13C
P1: 10.00 usec
PLM1: 50.0000000 W

===== CHANNEL f2 =====
SFO2: 400.1314600 MHz
NUC2: 1H
COPRO2: waltz16
PCPD2: 90.00 usec
PLM2: 10.3889800 W
PLM3: 0.2888900 W
PLM4: 0.2340000 W

F2 - Processing parameters
SI: 32768
SF: 100.6127417 MHz
WDW: EM
SSB: 0
LB: 1.00 Hz
GB: 0
PC: 1.40
```

D-asmaa-B17--d2o

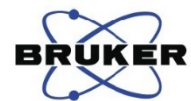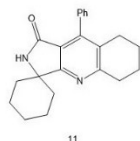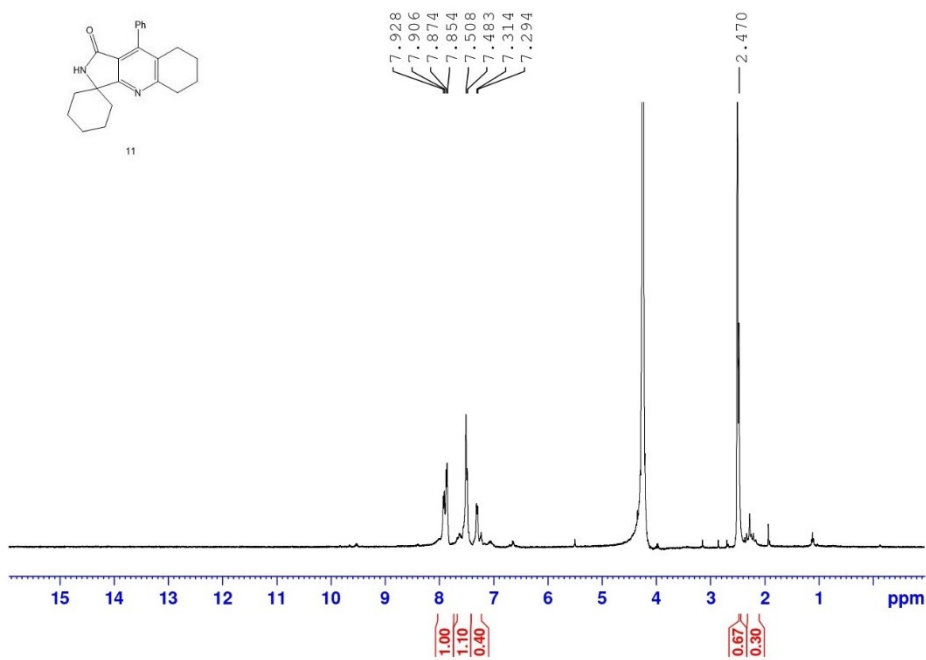

```
Current Data Parameters
NAME: D-asmaa-B17--d2o
EXPNO: 11
PROCNO: 1

F2 - Acquisition Parameters
Date_: 20220309
Time: 17.12
INSTRUM: spect
PROBHD: 5 mm PABBO
PULPROG: zg30
TD: 65536
SOLVENT: DMSO
NS: 16
DS: 2
SWH: 8012.820 Hz
FIDRES: 0.1322566 Hz
AQ: 4.0894465 sec
RG: 137.58
DW: 62.400 usec
DE: 4.50 usec
TE: 298.1 K
D1: 1.00000000 sec
D11: 1
D12: 1

===== CHANNEL f1 =====
SFO1: 400.1304710 MHz
NUC1: 1H
P1: 15.00 usec
PL1: 0.00 dB
PL12: 10.39999902 dB

F2 - Processing parameters
SI: 65536
SF: 400.1300044 MHz
WDW: EM
SSB: 0
LB: 0.30 Hz
GB: 0
PC: 1.00
```

12/5/2021

**D-asmaa-B22**  
**Instrument type and / or accessory**

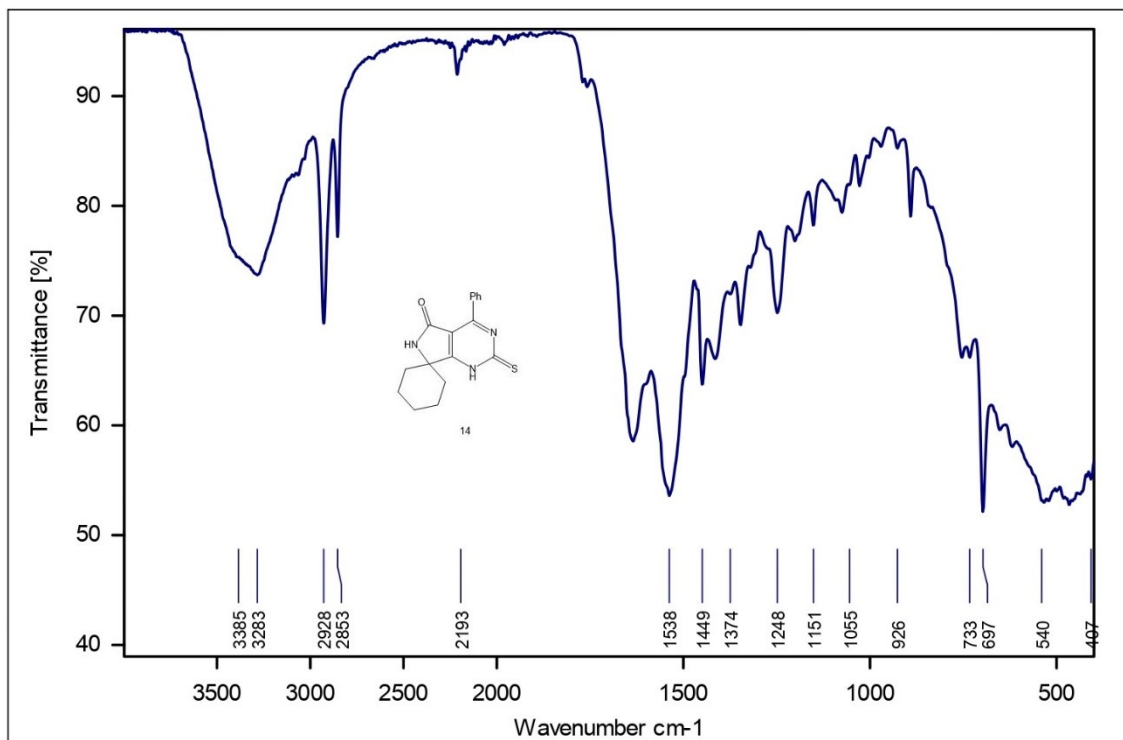

D-asmaa-B22-1H

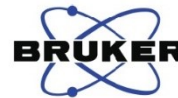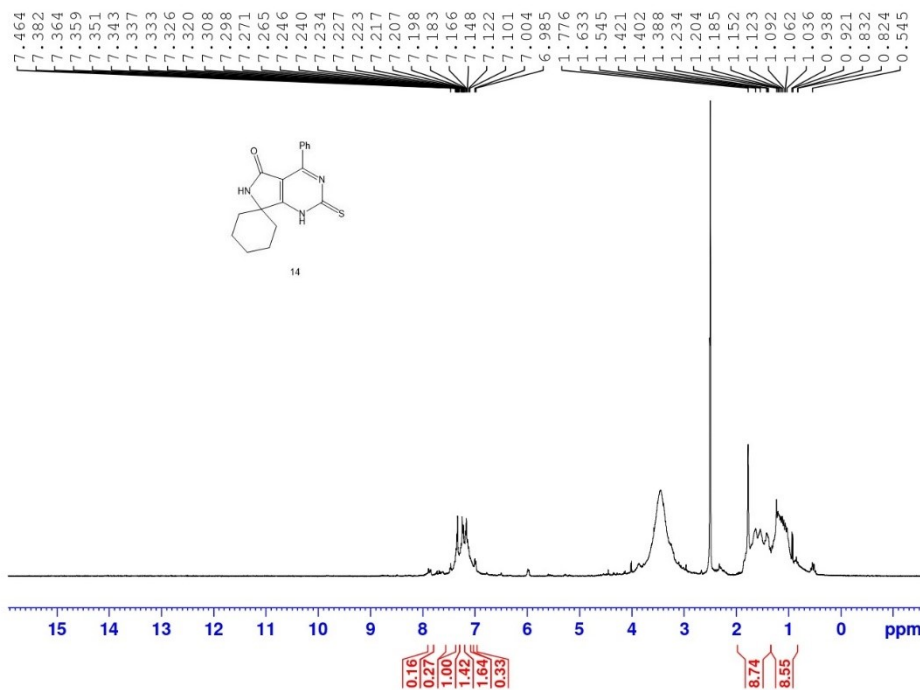

```
Current Data Parameters
NAME      D-asmaa-B22-1H
EXPNO    1
PROCNO   1
F2 - Acquisition Parameters
Date_    20220118
Time     10.54
INSTRUM  spect
PROBHD   5 mm PABBO_EB1
PULPROG  zgpg30
TD        65536
SOLVENT  DMSO
NS        2
DS        4
SWH       8012.800 Hz
FIDRES    0.112268 Hz
AQ        4.0504465 sec
RG         320.0
DF         61.400 usec
DE         8.50 usec
TE        298.1 K
SI        1.00000000 sec
DO        1
----- CHANNEL f1 -----
NUC1      400.130410 MHz
P1        15.00 usec
PLW1     10.39999962 W
F2 - Processing parameters
SI        65536
SF        400.1300035 MHz
WDW       EM
SSB       0
LB        0.30 Hz
GB        0
PC        1.00
```

D-asmaa-B22-c13

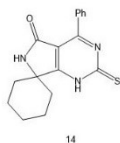

139.29  
128.93  
127.91  
127.62

47.15  
32.90  
32.15  
31.64  
25.10  
24.32  
23.25

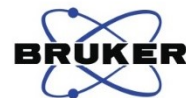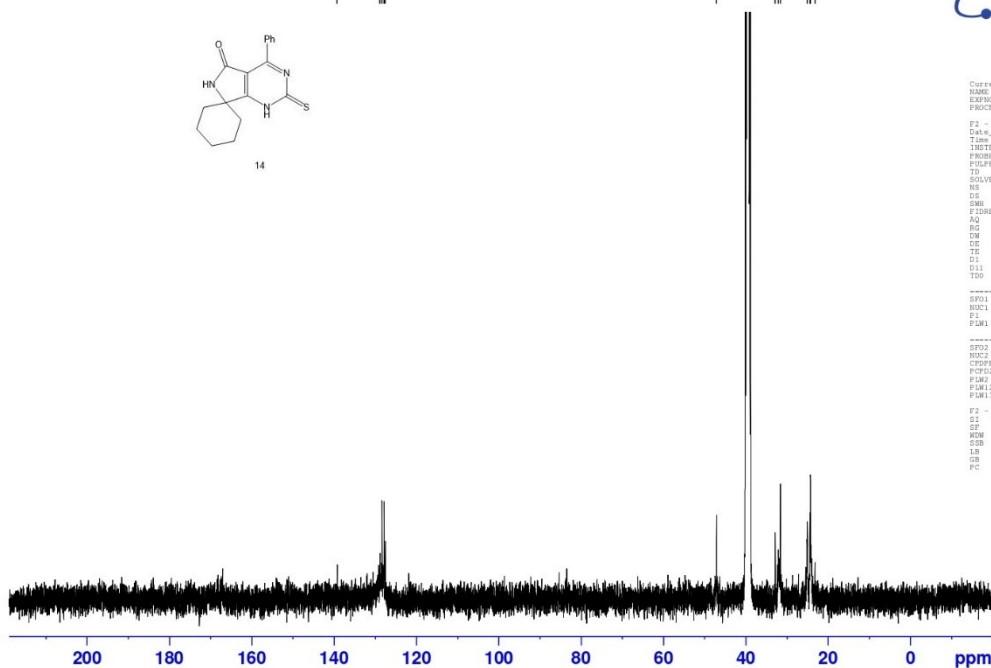

```
Current Data Parameters
NAME: D-asmaa-B22-c13
EXPNO: 1
PROCNO: 1

F2 - Acquisition Parameters
Date_: 20220211
Time: 6.28
INSTRUM: spect
PROBHD: 5 mm PABBO 90Q
PULPROG: zgpg30
TD: 45256
SOLVENT: DMSO
NS: 5000
DS: 4
SWE: 24038.40 Hz
FIDRES: 0.264798 Hz
AQ: 1.261188 sec
RG: 201.61
DM: 50.000 usec
DE: 6.50 usec
TE: 298.1 K
D1: 2.0000000 sec
d11: 0.0300000 sec
TD0: 1

----- CHANNEL f1 -----
NUC1: 13C
P1: 10.00 usec
PLW1: 50.0000000 W

----- CHANNEL f2 -----
SFO2: 400.136000 MHz
NUC2: 13C
PCPD2: wait166
PLW2: 10.3988960 W
PLW3: 0.2888900 W
PLW4: 0.2340000 W

F2 - Processing parameters
SI: 32768
SF: 100.618126 MHz
WDW: EM
SSB: 0
LB: 1.00 Hz
GB: 0
PC: 1.40
```

12/5/2021

**D-asmaa-B23**  
**Instrument type and / or accessory**

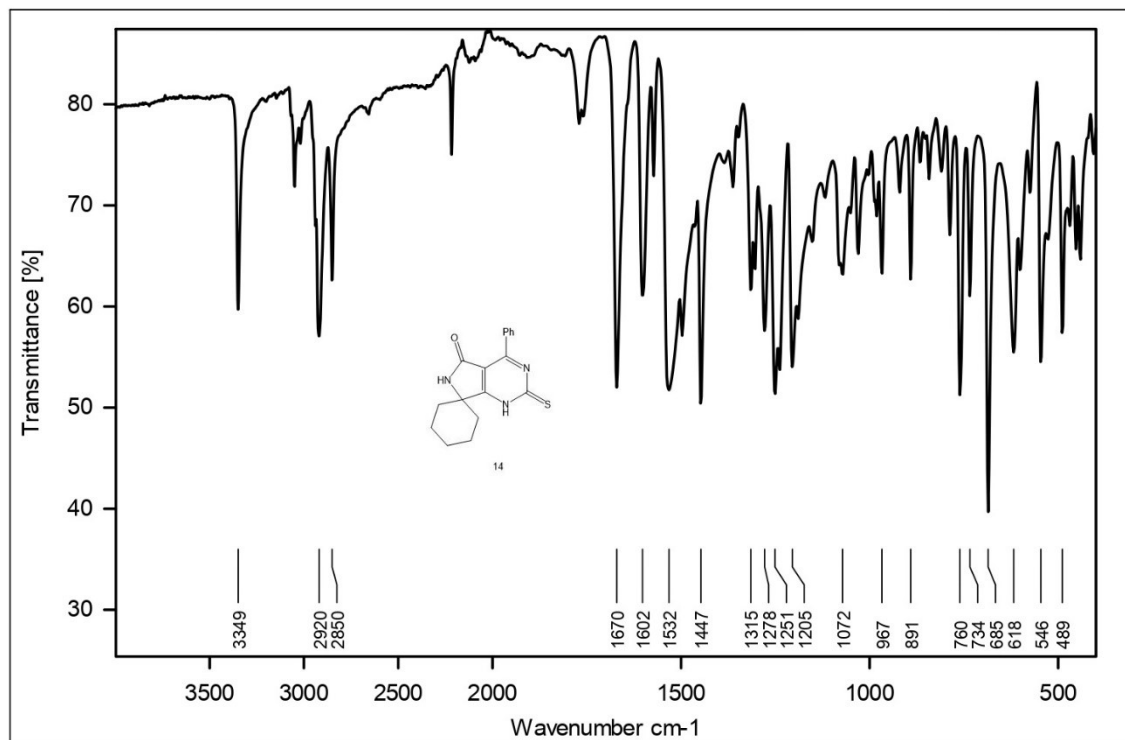

D-asmaa-B23-1H

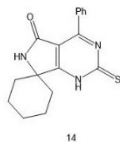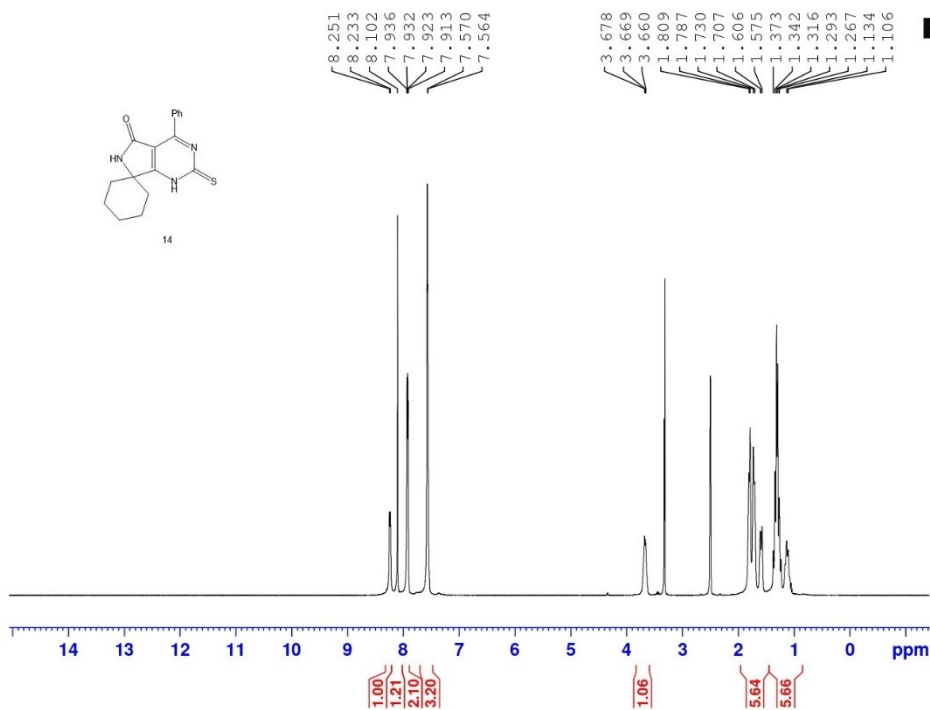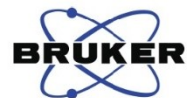

```
Current Data Parameters
NAME      D-asmaa-B23-1H
EXPNO    10
PROCNO   1

F2 - Acquisition Parameters
Date_    20220118
Time     11:12
INSTRUM  spect
PROBHD   5 mm PABBO 807
PULPROG  zg30
TE       65.55
SOLVENT  DMSO
NS       16
DS       2
SWH      8012.820 Hz
FIDRES   0.122266 Hz
AQ       4.0954463 sec
RG       128.0
DM       62.400 usec
DE       6.50 usec
TE       298.1 K
D1       1.00000000 sec
TD       1

===== CHANNEL f1 =====
SFO1     400.1324710 MHz
NUC1     1H
P1       15.00 usec
PLAN     10.3995942 W

F2 - Processing parameters
SI
SF       400.1300278 MHz
WDW      EM
SSB      0
LB       0.30 Hz
GB       0
PC       1.00
```

D-asmaa-B23-c13

160.35  
149.91  
132.16  
132.03  
129.88  
129.21  
116.42  
107.13

49.02  
32.00  
25.14  
24.77

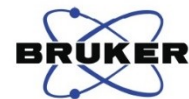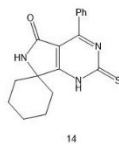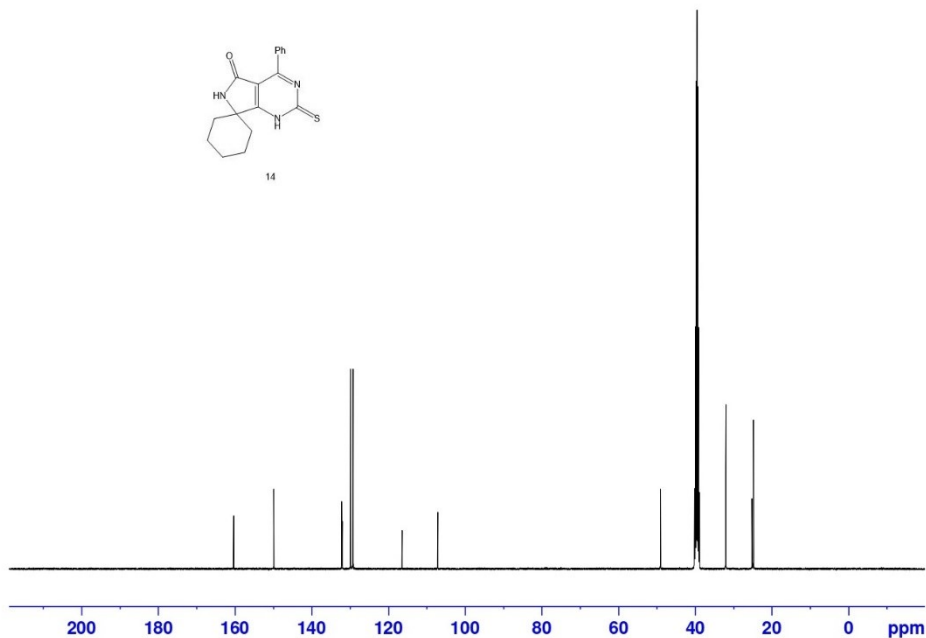

```
Current Data Parameters
NAME D-asmaa-B23-c13
EXPNO 10
PROCNO 1

F2 - Acquisition Parameters
Date_ 20220226
Time 21.00
INSTRUM spect
PROBHD 5 mm PABBO 5B1
PULPROG zgpg30
TD 65536
SOLVENT DMSO
NS 3000
DS 4
SWH 24028.461 Hz
FIDRES 0.366798 Hz
AQ 1.351488 sec
RG 201.61
DM 20.800 usec
DE 4.150 usec
TE 288.2 K
D1 2.00000000 sec
D11 0.03000000 sec
TD0 1

----- CHANNEL f1 -----
SFO1 100.628293 MHz
NUC1 13C
P1 10.00 usec
PL1 50.00000000 W

----- CHANNEL f2 -----
SFO2 400.1316005 MHz
NUC2 1H
CPDPRG2 waltz16
PCPD2 90.00 usec
PLM2 10.39999992 usec
PLM3 0.28888800 W
PLM1 0.23400000 W

F2 - Processing parameters
SI 32768
SF 100.618150 MHz
WDW EM
SSB 0
LB 1.00 Hz
GB 0
PC 1.40
```



12/5/2021

**D-asmaa-B21**  
**Instrument type and / or accessory**

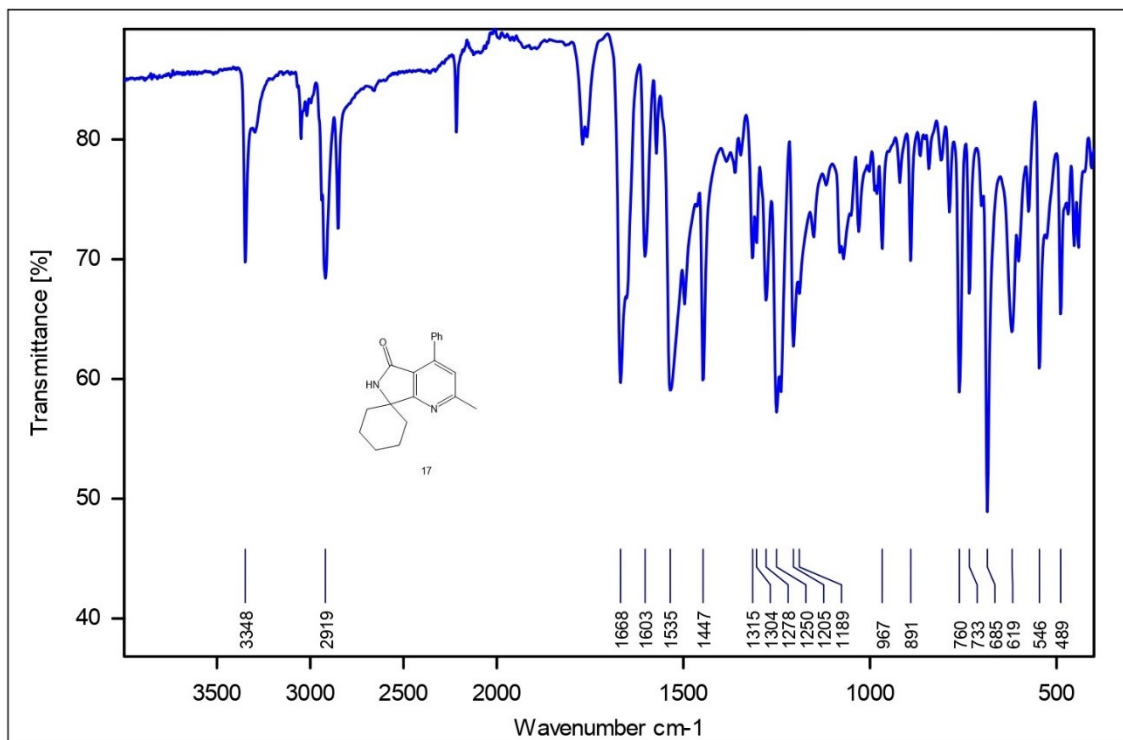

D-asmaa-B21-c13-

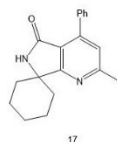

160.32  
149.89  
132.13  
132.02  
131.96  
129.18  
116.40  
107.12  
49.00  
31.98  
25.13  
24.76

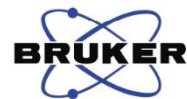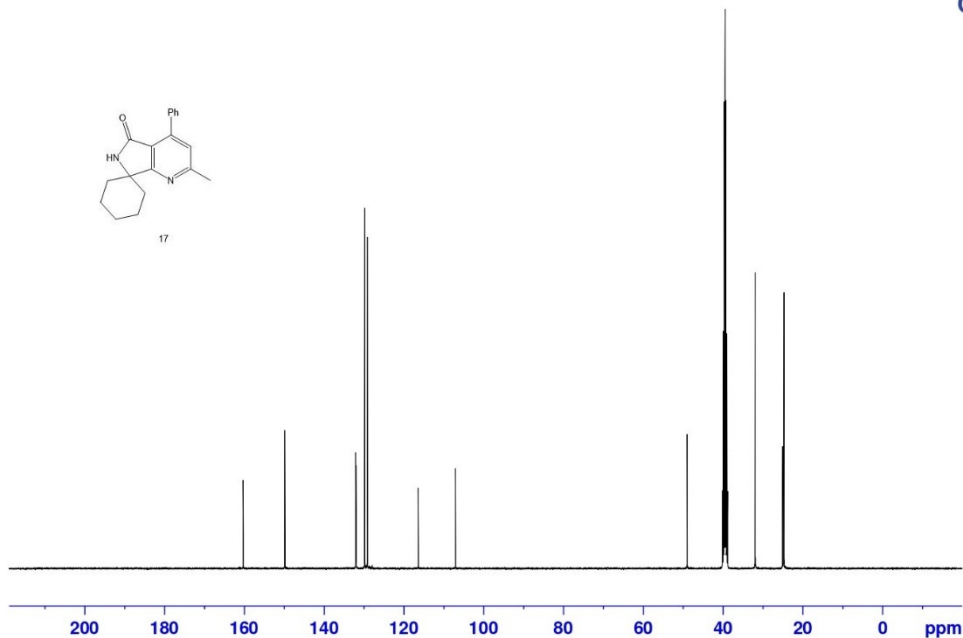

```
Current Data Parameters
NAME      D-asmaa-B21-c13-
EXPNO    1
PROCNO   1

F2 - Acquisition Parameters
Date_    20220220
Time     0.36
INSTRUM  spect
PROBHD   5 mm PABBO SBI
PULPROG  zgpg30
TD       65536
SOLVENT  DMSO
NS       3000
DS       4
SFO1     24038.461 Hz
FIDRES   0.364798 Hz
AQ       1.3611481 sec
RG       201.62
DW       20.800 usec
DE       4.50 usec
TE       298.2 K
D1       2.00000000 sec
D11      0.03000000 sec
TD0      1

===== CHANNEL F1 =====
SFO1     100.6228293 MHz
NUC1     13C
P1       19.00 usec
PL1      50.00000000 W

===== CHANNEL F2 =====
SFO2     400.1314005 MHz
NUC2     1H
CPDPRG2  waltz16
PCPD2    90.00 usec
PL12     10.33999962 W
PL13     0.28889000 W
PL14     0.23400000 W

F2 - Processing parameters
SI       32768
SF       100.6129168 MHz
WDW      EM
SSB      0
LB       1.00 Hz
GB       0
PC       1.40
```
